# Supplementary material for: Ce3+-enriched spherical porous ceria with an enhanced oxygen storage capacity
Source: Royal Society of Chemistry journal article supplement (doi:10.1039/d0ra10186a), 2021-01-01
Supplement: d0ra10186a1.pdf [file d0ra10186a1.pdf]

## Supplementary Information

# Ce<sup>3+</sup>-enriched Spherical Porous Ceria with an Enhanced Oxygen Storage Capacity

Ayano Taniguchi,<sup>a</sup> Yoshitaka Kumabe,<sup>a</sup> Kai Kan,<sup>a,b,c</sup> Masataka Ohtani<sup>\*a,b,c</sup> and Kazuya Kobiro<sup>\*a,b,c</sup>

a School of Environmental Science and Engineering,

b Laboratory for Structural Nanochemistry and

c Research Center for Molecular Design,

Kochi University of Technology, 185 Miyanokuchi, Tosayamada, Kami, Kochi 782-8502,  
Japan

\*Corresponding authors

Masataka Ohtani: ohtani.masataka@kochi-tech.ac.jp

Kazuya Kobiro: kobiro.kazuya@kochi-tech.ac.jp

## Preparation of a ceria

**CeO<sub>2</sub>-ME-FA:** A methanol solution (3.5 mL) including Ce(NO<sub>3</sub>)<sub>3</sub>·6H<sub>2</sub>O (152 mg, 0.350 mmol) and formic acid (66.6 μL, 1.75 mmol) was transferred to an SUS316 batch-type reactor (10 mL volume). The reactor was heated up to 300 °C at a rate of 5.4 °C/min. The temperature was kept at 300 °C for 10 min, and then the reaction was quenched by placing the reactor into an ice-water bath. The obtained product was centrifuged, washed with methanol, and then dried under vacuum for overnight at room temperature to give a powder.

**CeO<sub>2</sub>-ME-AA, CeO<sub>2</sub>-ME-BA, CeO<sub>2</sub>-ME-PA:** CeO<sub>2</sub>-ME-AA, CeO<sub>2</sub>-ME-BA, and CeO<sub>2</sub>-ME-PA were prepared by similar process to CeO<sub>2</sub>-ME-FA by using 1.75 mmol of acetic acid, benzoic acid and phthalic acid as additives, respectively.

**CeO<sub>2</sub>-ME-EG, CeO<sub>2</sub>-ME-dEG, CeO<sub>2</sub>-ME-tEG:** CeO<sub>2</sub>-ME-EG, CeO<sub>2</sub>-ME-dEG, and CeO<sub>2</sub>-ME-tEG were prepared by similar process to CeO<sub>2</sub>-ME-FA by using 11.1 mmol of ethylene glycol, diethylene glycol and triethylene glycol as additives, respectively.

**CeO<sub>2</sub>-AN:** CeO<sub>2</sub>-AN was prepared by similar process to CeO<sub>2</sub>-ME-FA by using acetonitrile as a solvent without additive.

**CeO<sub>2</sub>-AN-EG, CeO<sub>2</sub>-ME-dEG:** CeO<sub>2</sub>-AN-EG and CeO<sub>2</sub>-ME-dEG were prepared by similar process to CeO<sub>2</sub>-ME-FA by using acetonitrile as a solvent with 11.1 mmol of ethylene glycol and diethylene glycol as additives, respectively.

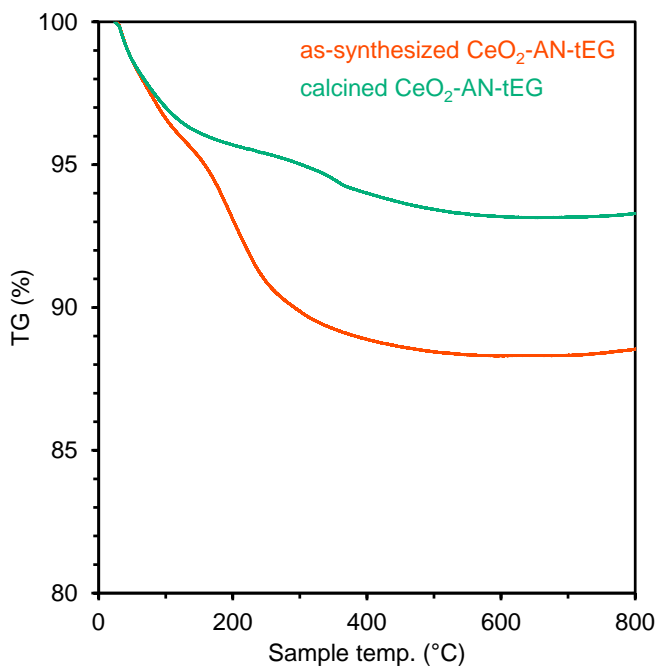

**Fig. S1** TG profile of as-synthesized CeO<sub>2</sub>-AN-tEG (red) and calcined CeO<sub>2</sub>-AN-tEG (green). Both of them showed less than 2% weight loss after 300 °C.

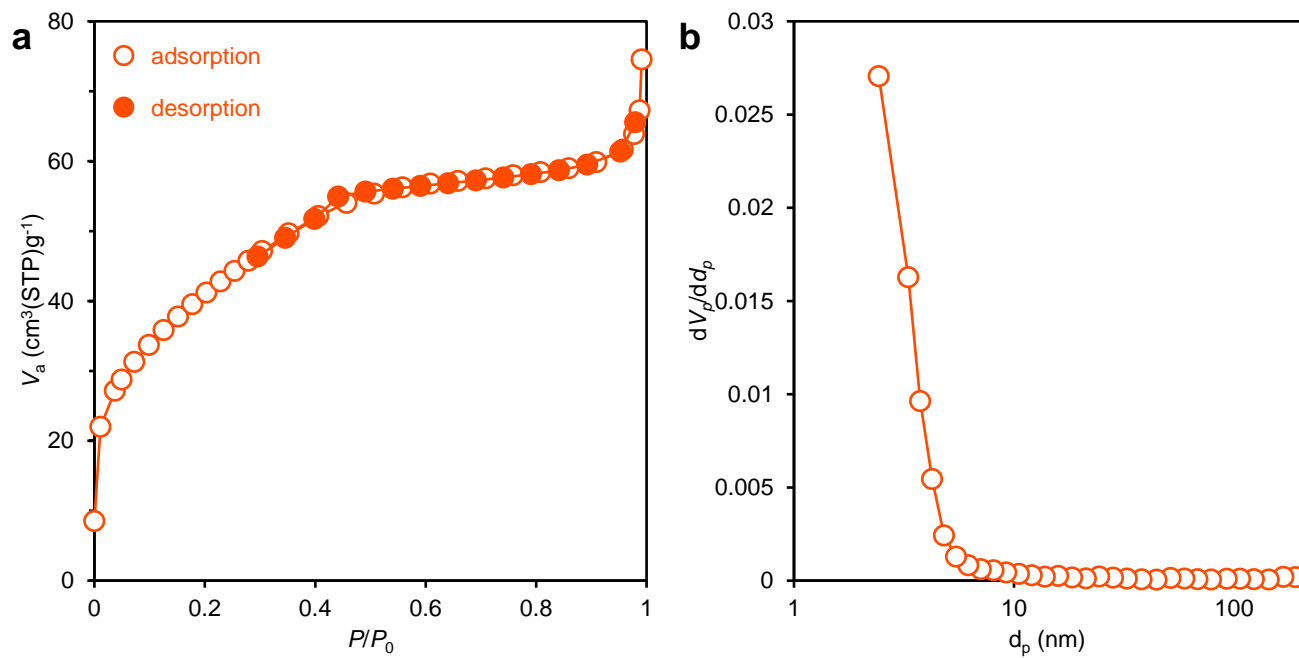

**Fig. S2** N<sub>2</sub> adsorption/desorption measurements of CeO<sub>2</sub>-AN-tEG. (a) Adsorption/desorption isotherm and (b) pore size distribution (BJH plot).

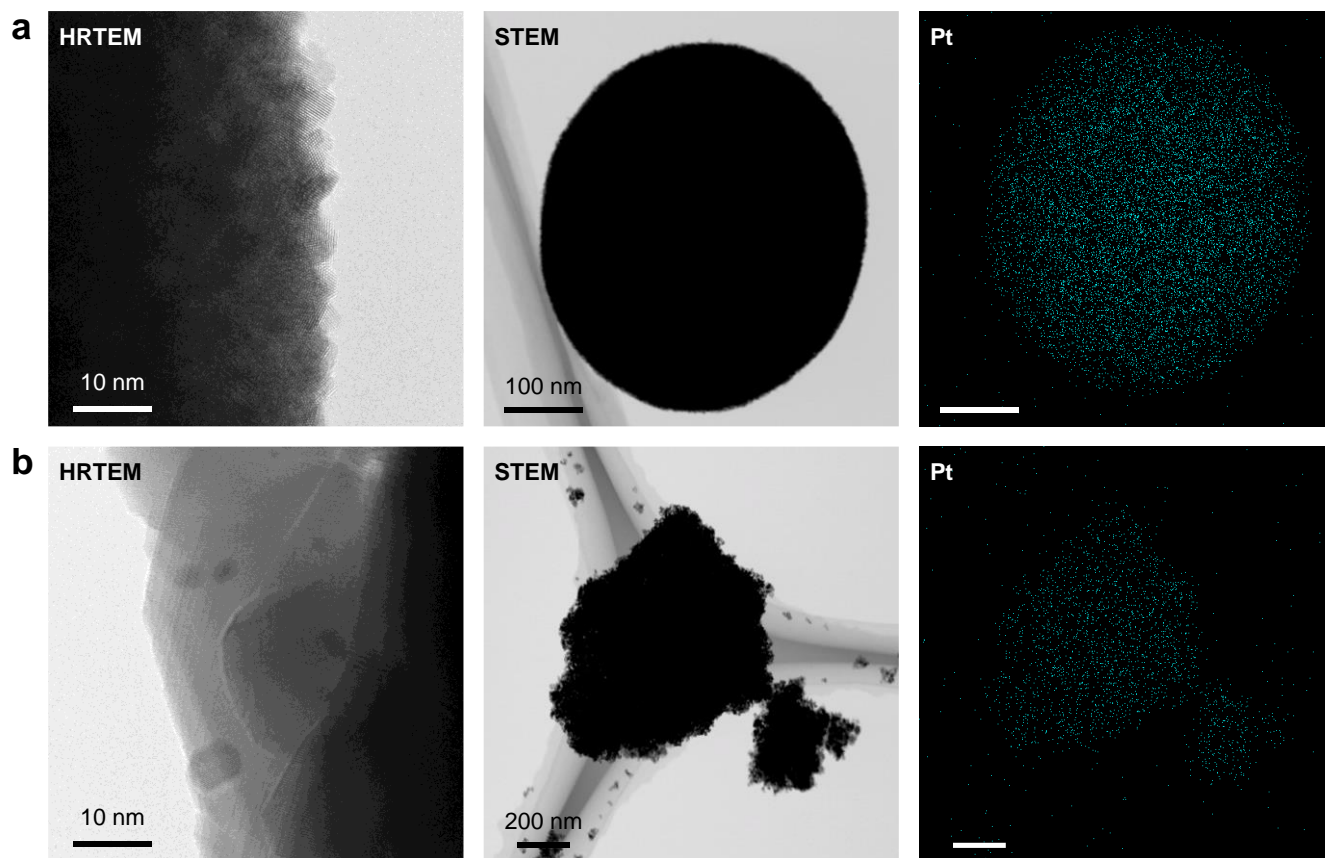

**Fig. S3** Characterization of Pt-deposited CeO<sub>2</sub> catalyst. High resolution TEM images, STEM images and EDX mapping images of (a) Pt/CeO<sub>2</sub>-AN-tEG and (b) Pt/JRC-CEO-5.

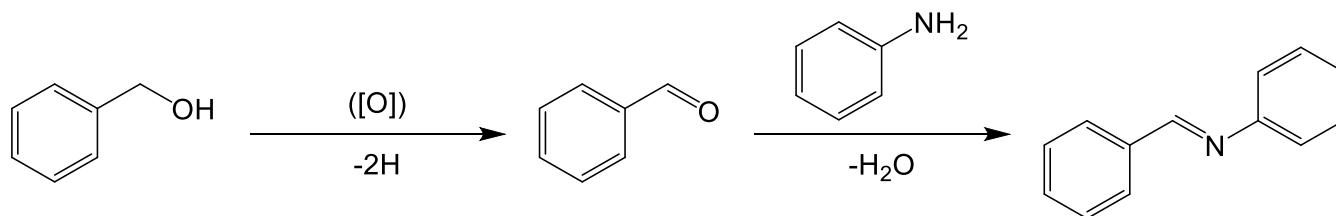

**Fig. S4** Reaction path yielding *N*-benzylideneaniline from benzyl alcohol catalyzed by CeO<sub>2</sub>.

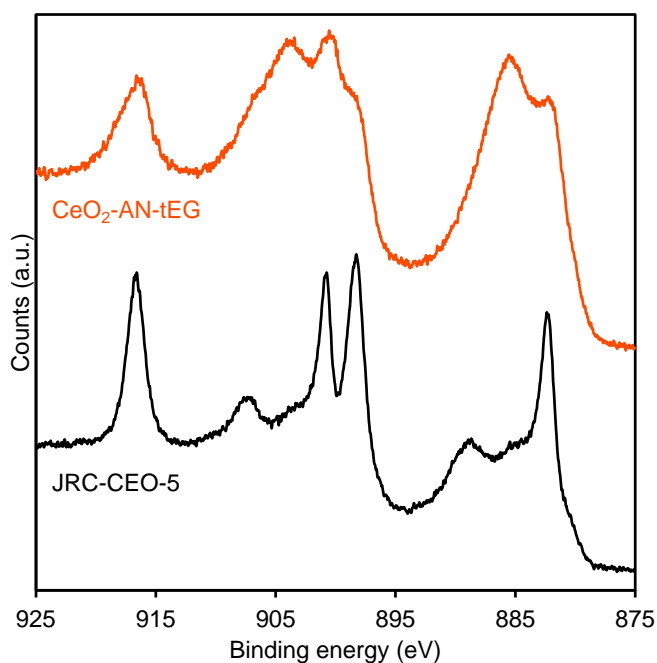

**Fig. S5** Ce 3d HAXPES spectra of CeO<sub>2</sub>-AN-tEG (red) and JRC-CEO-5 (black).

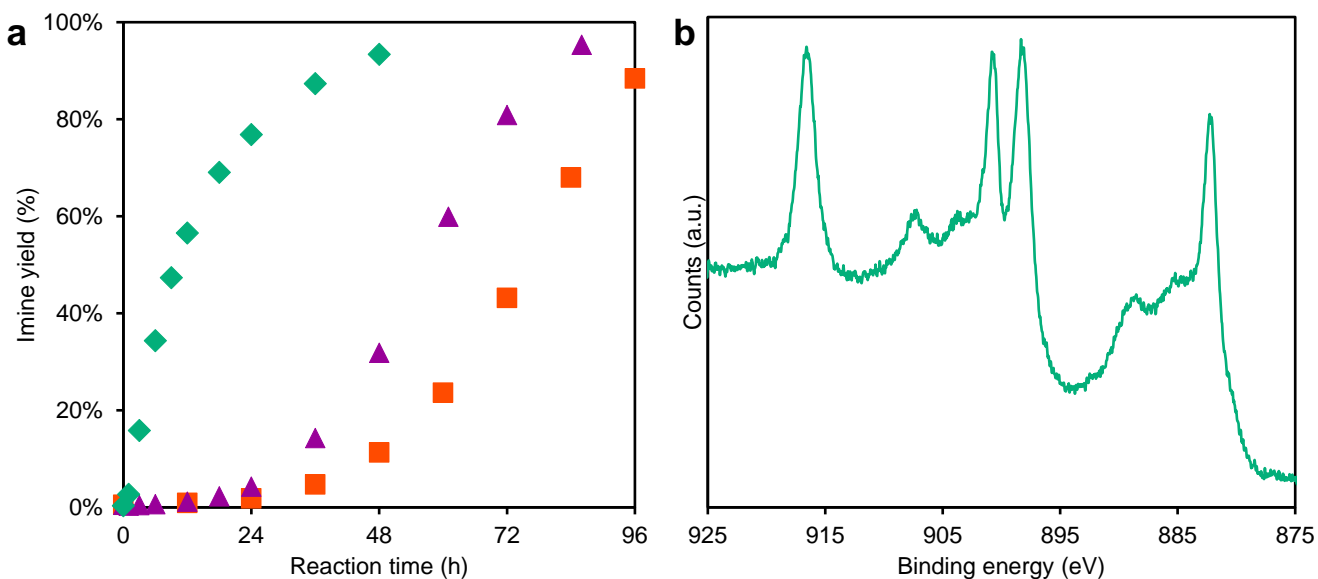

**Fig. S6** Liquid phase oxidation reaction catalyzed by CeO<sub>2</sub>. (a) Time course of imine yield with as-synthesized (red), calcined (green) and pretreated (violet) CeO<sub>2</sub>-AN-tEG. Data on as-synthesized CeO<sub>2</sub>-AN-tEG are same to those on CeO<sub>2</sub>-AN-tEG showed in Fig. 3c. Calcination was performed at 300 °C for 1 h in air. (b) HAXPES spectrum of calcined CeO<sub>2</sub>-AN-tEG at 300 °C for 1 h in air.

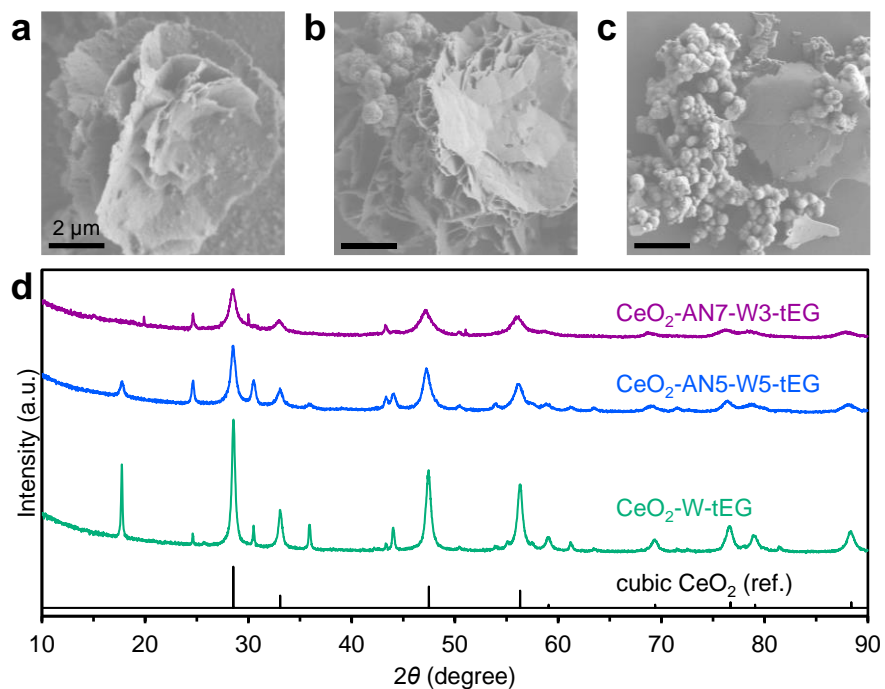

**Fig. S7** SEM images of CeO<sub>2</sub>, (a) CeO<sub>2</sub>-AN7-W3-tEG, (b) CeO<sub>2</sub>-AN5-W5-tEG and (c) CeO<sub>2</sub>-W-tEG synthesized at 300 °C (scale bar: 2 μm). (d) XRD patterns of synthesized CeO<sub>2</sub>, CeO<sub>2</sub>-AN7-W3-tEG, CeO<sub>2</sub>-AN5-W5-tEG and CeO<sub>2</sub>-W-tEG. Black line represents reference XRD pattern of cubic CeO<sub>2</sub>.

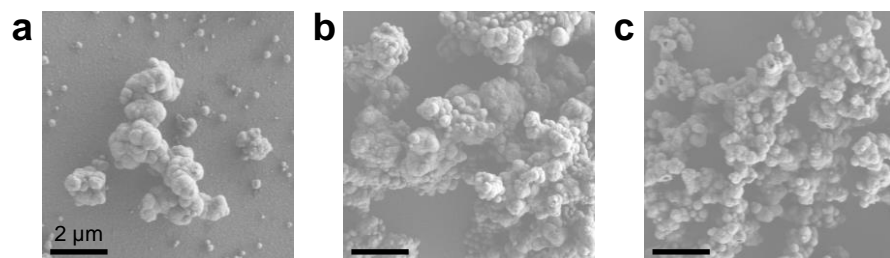

**Fig. S8** SEM images of CeO<sub>2</sub>, (a) CeO<sub>2</sub>-AN7-W3-tEG, (b) CeO<sub>2</sub>-AN5-W5-tEG and (c) CeO<sub>2</sub>-W-tEG synthesized at 250 °C (scale bar: 2 μm).

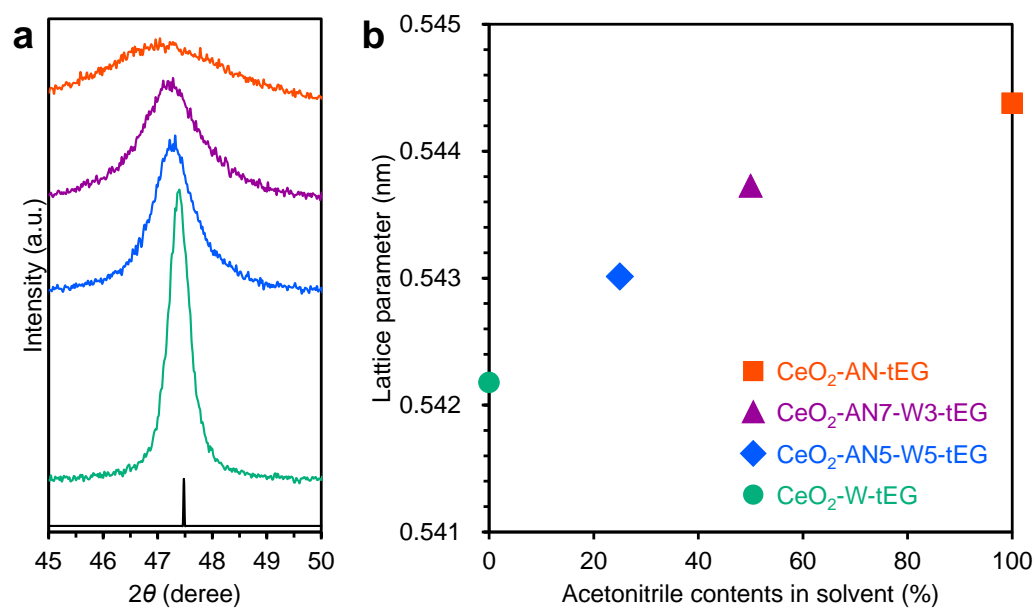

**Fig. S9** XRD peak of (220) facet (a) and lattice parameter (b) of CeO<sub>2</sub> prepared in acetonitrile/water mixed solvents with different ratio. CeO<sub>2</sub>-AN-tEG (red), CeO<sub>2</sub>-AN7-W3-tEG (violet), CeO<sub>2</sub>-AN5-W5-tEG (blue) and CeO<sub>2</sub>-W-tEG (green). Black line represents reference XRD pattern of cubic CeO<sub>2</sub>.

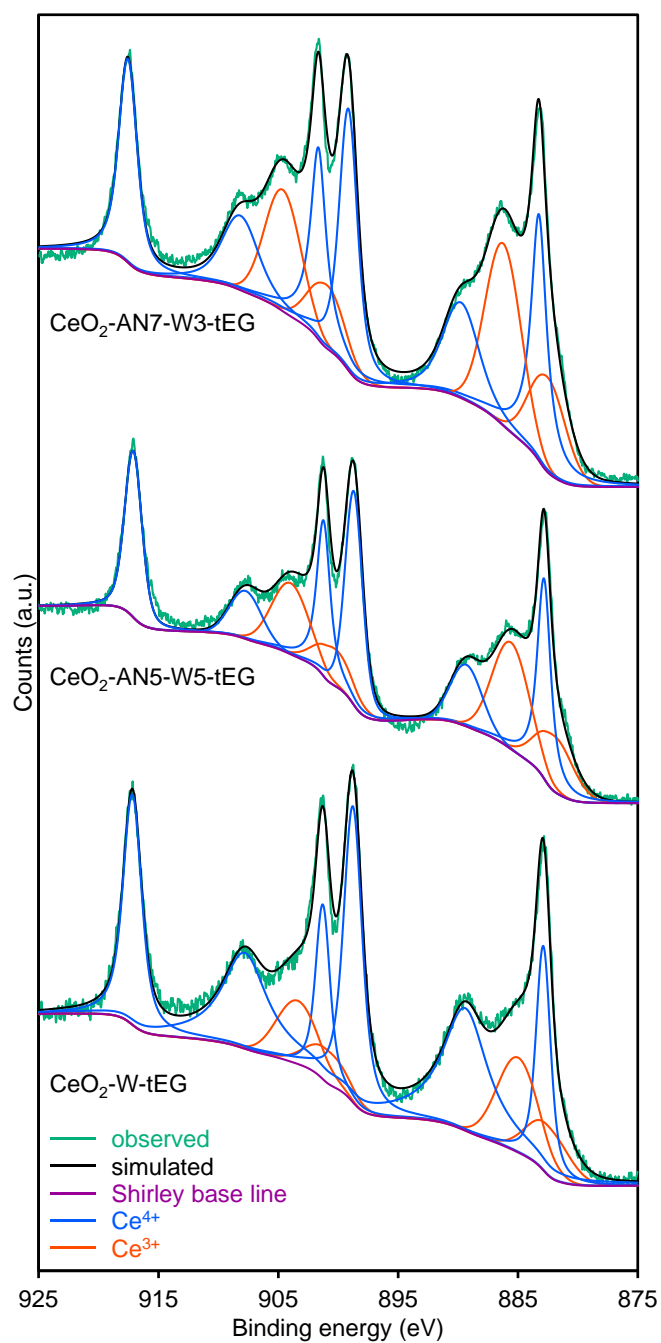

**Fig. S10** Ce 3d HAXPES spectra and peak fitting curves of CeO<sub>2</sub>-AN7-W3-tEG, CeO<sub>2</sub>-AN5-W5-tEG and CeO<sub>2</sub>-W-tEG. Observed (green), Shirley base line (violet), deconvolution peaks of Ce<sup>4+</sup> (blue), deconvolution peaks of Ce<sup>3+</sup> (red) and simulated curve (black).



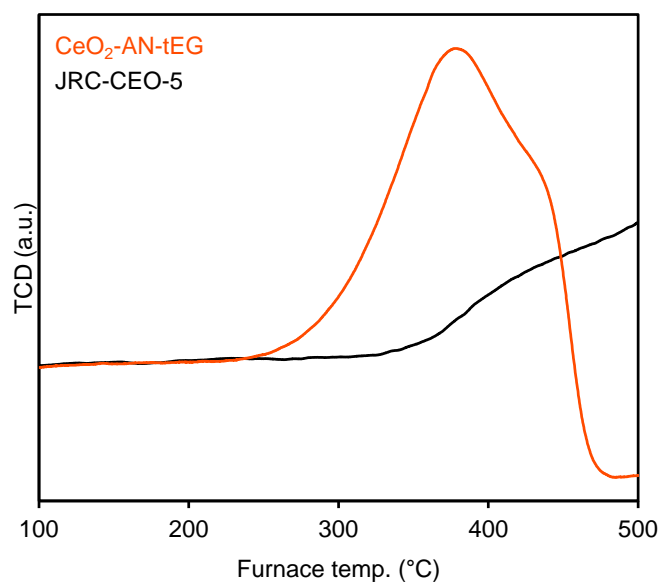

**Fig. S11** H<sub>2</sub>-TPR profiles of CeO<sub>2</sub>-AN-tEG (red) and JRC-CEO-5 (black).

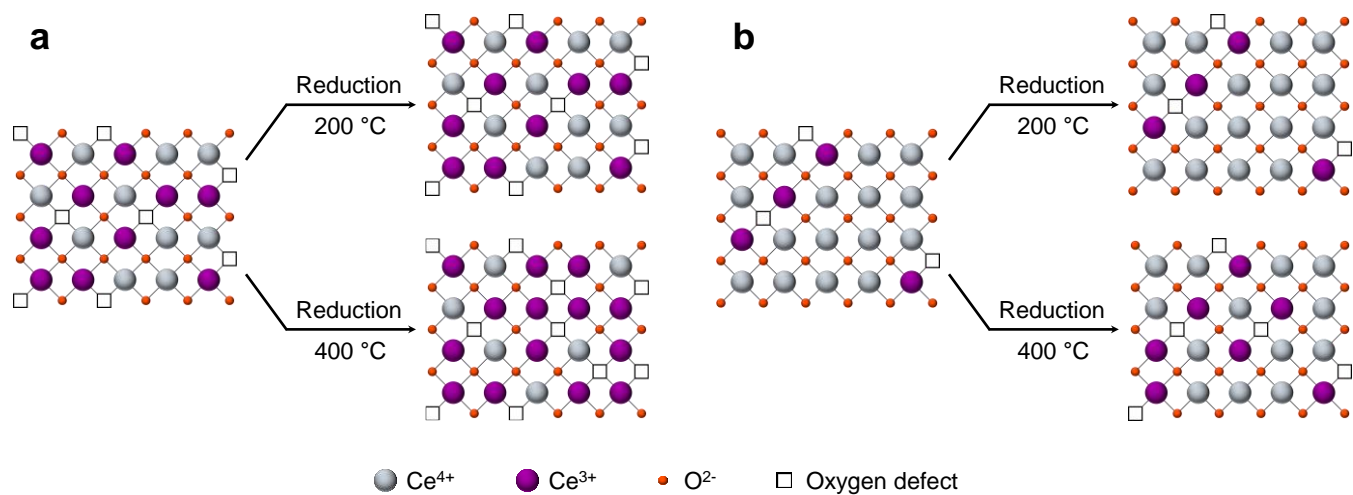

**Fig. S12** Schematic diagram of CeO<sub>2</sub> reduction at 200 °C and 400 °C. (a) CeO<sub>2</sub>-AN-tEG and (b) JRC-CEO-5. Ce<sup>4+</sup> (gray circle) is partially reduced by H<sub>2</sub> to yield Ce<sup>3+</sup> (violet circle). Then, new oxygen defects (square) are generated.

**Table S1** Synthetic conditions of ceria porous spheres.

| Sample name <sup>a</sup>     | Solvent                                       | Additive                | Temperature (°C) |
|------------------------------|-----------------------------------------------|-------------------------|------------------|
| CeO <sub>2</sub> -ME-FA      | CH <sub>3</sub> OH                            | Formic acid             | 300              |
| CeO <sub>2</sub> -ME-AA      | CH <sub>3</sub> OH                            | Acetic acid             | 300              |
| CeO <sub>2</sub> -ME-BA      | CH <sub>3</sub> OH                            | Benzoic acid            | 300              |
| CeO <sub>2</sub> -ME-PA      | CH <sub>3</sub> OH                            | <i>o</i> -Phthalic acid | 300              |
| CeO <sub>2</sub> -ME-EG      | CH <sub>3</sub> OH                            | Ethylene glycol         | 300              |
| CeO <sub>2</sub> -ME-dEG     | CH <sub>3</sub> OH                            | Diethylene glycol       | 300              |
| CeO <sub>2</sub> -ME-tEG     | CH <sub>3</sub> OH                            | Triethylene glycol      | 300              |
| CeO <sub>2</sub> -AN         | CH <sub>3</sub> CN                            | –                       | 300              |
| CeO <sub>2</sub> -AN-EG      | CH <sub>3</sub> CN                            | Ethylene glycol         | 300              |
| CeO <sub>2</sub> -AN-dEG     | CH <sub>3</sub> CN                            | Diethylene glycol       | 300              |
| CeO <sub>2</sub> -AN-tEG     | CH <sub>3</sub> CN                            | Triethylene glycol      | 300              |
| CeO <sub>2</sub> -AN7-W3-tEG | CH <sub>3</sub> CN/H <sub>2</sub> O=7/3 (v/v) | Triethylene glycol      | 250 <sup>b</sup> |
| CeO <sub>2</sub> -AN5-W5-tEG | CH <sub>3</sub> CN/H <sub>2</sub> O=5/5 (v/v) | Triethylene glycol      | 250 <sup>b</sup> |
| CeO <sub>2</sub> -W-tEG      | H <sub>2</sub> O                              | Triethylene glycol      | 250 <sup>b</sup> |

<sup>a</sup> Short abbreviations ME, FA, AA, BA, PA, EG, dEG, tEG, AN and W represent methanol, formic acid, acetic acid, benzoic acid, *o*-phthalic acid, ethylene glycol, diethylene glycol, triethylene glycol, acetonitrile and water, respectively. <sup>b</sup> Diffraction peaks ascribed to non-cubic ceria phase were recognized in the XRD patterns of product obtained at 300 °C (Fig. S7). Then, reaction temperature was lowered to 250 °C (Fig. S8).

**Table S2** Peak positions of Ce3d HAXPES spectra.

| Sample name <sup>a</sup>     | Peak position (eV) |       |       |       |       |                |       |       |       |       |
|------------------------------|--------------------|-------|-------|-------|-------|----------------|-------|-------|-------|-------|
|                              | v <sup>0</sup>     | v     | v'    | v''   | v'''  | u <sup>0</sup> | u     | u'    | u''   | u'''  |
| CeO <sub>2</sub> -AN-tEG     | 883.4              | 883.6 | 887.0 | 890.4 | 899.8 | 901.8          | 902.0 | 905.4 | 908.8 | 918.2 |
| CeO <sub>2</sub> -AN7-W3-tEG | 882.6              | 883.3 | 886.2 | 889.8 | 899.1 | 901.0          | 901.7 | 904.6 | 908.2 | 917.5 |
| CeO <sub>2</sub> -AN5-W5-tEG | 882.0              | 882.8 | 885.6 | 889.3 | 898.7 | 900.4          | 901.2 | 904.0 | 907.7 | 917.1 |
| CeO <sub>2</sub> -W-tEG      | 882.6              | 882.9 | 885.0 | 889.4 | 898.8 | 901.0          | 901.3 | 903.4 | 907.8 | 917.2 |
| JRC-CEO-5                    | 882.2              | 882.8 | 885.1 | 889.3 | 898.7 | 900.6          | 901.2 | 903.5 | 907.7 | 917.1 |

<sup>a</sup> Short abbreviations tEG, AN, and W represent triethylene glycol, acetonitrile and water, respectively.

**Table S3** Crystallite size and Ce<sup>3+</sup> concentration of ceria.

| Sample name <sup>a</sup> | CeO <sub>2</sub> -AN-tEG | CeO <sub>2</sub> -AN7-W3-tEG | CeO <sub>2</sub> -AN5-W5-tEG | CeO <sub>2</sub> -W-tEG | JRC-CEO-5 |
|--------------------------|--------------------------|------------------------------|------------------------------|-------------------------|-----------|
| Crystallite size (nm)    | 3.3                      | 6.8                          | 10.2                         | 21.4                    | 9.9       |
| Ce <sup>3+</sup> (at%)   | 57.4                     | 36.7                         | 36.3                         | 22.6                    | 22.5      |
| Lattice parameter (nm)   | 0.544                    | 0.544                        | 0.543                        | 0.542                   | 0.541     |

<sup>a</sup> Short abbreviations tEG, AN, and W represent triethylene glycol, acetonitrile and water, respectively.
